# Supplementary material for: The Micronemal Plasmodium Proteins P36 and P52 Act in Concert to Establish the Replication-Permissive Compartment Within Infected Hepatocytes
Source: Front Cell Infect Microbiol. 2018 Nov 27;8:413. doi: 10.3389/fcimb.2018.00413 (PMC6280682; doi:10.3389/fcimb.2018.00413)
Supplement: Supplementary file 2 [file Data_Sheet_2.xlsx]

## Sheet: S3_Table
Table S3. All protein evidence identified from immunoprecipitation (IP) experiments. Proteins listed were identified with ProteinProphet probabilities corresponding to a false discovery rate (FDR) less than 1.0%. The total number of high-quality peptide (a) spectrum matches (PSM's), peptides (b) and non-degenerate peptides (c) identifying the protein. PSM's and peptides were only counted if they …
Gene ID	Protein	Description	Protein Length	P36-mCherry sporozoites							Wild type sporozoites			Crosslinked P36-mCherry sporozoites				P52-cMyc sporozoites				GFP-luc sporozoites			P36-mCherry IP		Crosslinked P36-mCherry		P52-cMyc IP
				Naked Beads			anti-mCherry beads							anti-mCherry beads				anti-cMyc beads
				PSMa	Peptidesb	Non-degenerate Peptidesc	PSMa	Spectral Abundance Factord	Peptidesb	Non-degenerate Peptidesc	PSMa	Peptidesb	Non-degenerate Peptidesc	PSMa	Spectral Abundance Factord	Peptidesb	Non-degenerate Peptidesc	PSMa	Spectral Abundance Factord	Peptidesb	Non-degenerate Peptidesc	PSMa	Peptidesb	Non-degenerate Peptidesc	Test:Controle	Rankg	Test:Controlf	Rankg	Test:Controle	Rankg
tr|X5DSL3|X5DSL3_ANAMA		mCherry	236	0	0	0	109	0.461864	12	12	0	0	0	137	0.580508	51	51	0	0	0	0	0	0	0	109	1	137	1	-	-
PY17X_1003500	P36	6-cysteine protein	356	0	0	0	77	0.216292	14	14	0	0	0	48	0.134831	24	24	11	0.0308989	6	6	0	0	0	77	2	48	3	11	3
PY17X_1003600	P36p	6-cysteine protein, putative	481	0	0	0	58	0.120582	10	10	0	0	0	58	0.120582	39	39	63	0.130977	15	15	0	0	0	58	3	58	2	63	1
PY17X_0822200	HSP70-2	heat shock protein 70, putative	651	0	0	0	16.6667	0.0256017	9	7	0	0	0	27.4001	0.0420893	23	18	77.7778	0.119474	29	25	3.2609	5	3	16.6667	4	27.4001	6	23.8516	2
PY17X_0712100	HSP70	heat shock protein 70, putative	682	0	0	0	4.2896	0.00628974	4	1	1.1837	3	1	13.177	0.0193211	12	8	15.6046	0.0228806	9	3	12.559	8	3	3.62389	5	11.132	7	1.2425	38
PY17X_0613400	HSP40	HSP40, subfamily A, putative	424	0	0	0	3	0.00707547	1	1	0	0	0	0	0	0	0	0	0	0	0	0	0	0	3	6	-	-	-	-
PY17X_0613100	PPP1	peripheral plastid protein 1, putative	496	0	0	0	2	0.00403226	1	0	0	0	0	0	0	0	0	0	0	0	0	0	0	0	2	7	-	-	-	-
PY17X_0821000	HoMu	RNA-binding protein musashi, putative	344	0	0	0	10	0.0290698	5	5	7	5	5	0	0	0	0	0	0	0	0	0	0	0	1.42857	8	-	-	-	-
PY17X_1461900	ACT1	actin I, putative	376	5.3333	6	3	27.0769	0.072013	11	7	26.2816	14	8	21.3425	0.0567621	21	12	52.7233	0.140222	21	14	63.3308	24	13	1.03026	9	0.812072	98	0.832506	71
PY17X_0808800	HSP90	heat shock protein 90, putative	721	0	0	0	1.0588	0.00146852	2	1	1.0556	2	0	5	0.00693481	5	4	5.7702	0.00800305	6	4	5.5882	2	1	1.00303	10	4.73664	25	1.03257	42
PY17X_0405400	CSP	circumsporozoite (CS) protein	427	2	2	2	13	0.030445	3	3	13	3	3	8	0.0187354	4	4	13	0.030445	3	3	7	2	2	1	11	0.615385	100	1.85714	26
PY17X_1036900		conserved Plasmodium protein, unknown function	405	4	3	3	5	0.0123457	1	1	5	2	2	6	0.0148148	6	6	4	0.00987654	1	1	5	3	3	1	12	1.2	63	0.8	73
PY17X_1215400		conserved Plasmodium protein, unknown function	486	0	0	0	1	0.00205761	1	1	0	0	0	0	0	0	0	0	0	0	0	0	0	0	1	13	-	-	-	-
PY17X_1446500	MIF	macrophage migration inhibitory factor	116	0	0	0	2	0.0172414	1	1	2	1	1	0	0	0	0	1	0.00862069	1	1	2	1	1	1	14	-	-	0.5	86
PY17X_1354800	TRAP	thrombospondin-related anonymous protein	816	7	3	3	55	0.067402	17	17	59	17	17	14	0.0171569	11	11	104	0.127451	24	24	111	30	30	0.932203	15	0.237288	101	0.936937	65
PY17X_1134800,PY17X_1134900	EF-1alpha	elongation factor 1-alpha, putative	443	1.7143	3	1	9	0.020316	5	3	10	6	2	10.1818	0.0229838	9	7	31.4286	0.0709449	11	8	38.6667	15	12	0.9	16	1.01818	68	0.812808	72
PY17X_1434600	CelTOS	cell traversal protein for ookinetes and sporozoites	185	3	2	2	2	0.0108108	1	1	3	2	2	2	0.0108108	2	2	2	0.0108108	1	1	3	2	2	0.666667	17	0.666667	99	0.666667	79
PY17X_1210100		tubulin beta chain, putative	445	0	0	0	2.6667	0.00599258	2	1	5.5571	4	2	8.09804	0.0181978	11	6	30.6592	0.0688971	12	9	26.0526	10	8	0.479873	18	1.45724	59	1.17682	39
PY17X_1330200	GAPDH	glyceraldehyde-3-phosphate dehydrogenase	337	2	1	1	5	0.0148368	3	3	13	7	7	11	0.0326409	10	10	81	0.240356	21	20	85	21	20	0.384615	19	0.846154	97	0.952941	64
PY17X_1119700		cell division cycle protein 48 homologue, putative	815	0	0	0	0	0	0	0	0	0	0	37.9024	0.0465061	24	23	0	0	0	0	0	0	0	-	-	37.9024	4	-	-
PY17X_1007600	SIAP1	sporozoite invasion-associated protein 1	999	0	0	0	0	0	0	0	0	0	0	35	0.035035	27	27	7	0.00700701	3	3	0	1	1	-	-	35	5	7	4
PY17X_0612800,PY17X_1143100		polyubiquitin, putative;ubiquitin-60S ribosomal protein L40, putative	221	0	0	0	0	0	0	0	0	0	0	10	0.0452489	10	1	0	0	0	0	0	0	0	-	-	10	8	-	-
PY17X_1217200	HSP60	heat shock protein 60, putative	579	0	0	0	0	0	0	0	0	0	0	10	0.0172712	10	10	0	0	0	0	0	0	0	-	-	10	9	-	-
PY17X_1347200		conserved Plasmodium protein, unknown function	1583	0	0	0	0	0	0	0	0	0	0	8	0.0050537	7	7	0	0	0	0	0	0	0	-	-	8	10	-	-
PY17X_1425300	ALBA1	DNA/RNA-binding protein Alba 1, putative	241	0	0	0	0	0	0	0	0	0	0	7	0.0290456	6	6	1	0.00414938	1	1	0	0	0	-	-	7	11	1	43
PY17X_1127000		pyruvate kinase, putative	511	0	0	0	0	0	0	0	0	0	0	7	0.0136986	7	7	8	0.0156556	5	5	14	9	9	-	-	7	12	0.571429	84
PY17X_1344800	LDH	L-lactate dehydrogenase, putative	316	0	0	0	0	0	0	0	0	0	0	7	0.0221519	6	6	0	0	0	0	18	7	7	-	-	7	13	-	-
PY17X_0108900	CCT6	T-complex protein 1 subunit zeta, putative	543	0	0	0	0	0	0	0	0	0	0	6.42857	0.011839	7	5	2	0.00368324	1	1	1	1	1	-	-	6.42857	14	2	16
PY17X_1139200	GAC	glideosome-associated connector, putative	2605	0	0	0	0	0	0	0	0	0	0	6	0.00230326	6	6	107	0.0410749	44	44	69	37	37	-	-	6	15	1.55072	29
PY17X_1217500	ENO	enolase	446	0	0	0	0	0	0	0	0	0	0	6	0.0134529	3	3	16	0.0358744	11	11	29	15	15	-	-	6	16	0.551724	85
PY17X_0407400	CCT2	T-complex protein 1 subunit beta, putative	533	0	0	0	0	0	0	0	0	0	0	6	0.011257	6	6	0	0	0	0	3	1	1	-	-	6	17	-	-
PY17X_0708300	SEC23	protein transport protein SEC23, putative	759	0	0	0	0	0	0	0	0	0	0	6	0.00790514	6	6	0	0	0	0	0	0	0	-	-	6	18	-	-
PY17X_0712800	14-3-3I	14-3-3 protein, putative	262	0	0	0	0	0	0	0	0	0	0	5.90909	0.0225538	7	5	8	0.0305344	6	5	18.8182	9	8	-	-	5.90909	19	0.42512	94
PY17X_0932300		GTP-binding nuclear protein RAN/TC4, putative	214	0	0	0	0	0	0	0	0	0	0	5.83333	0.0272586	5	4	11	0.0514019	6	6	13.2	8	6	-	-	5.83333	20	0.833333	69
PY17X_1370100		glycerol kinase, putative	501	0	0	0	0	0	0	0	0	0	0	5	0.00998004	5	5	10	0.0199601	4	4	5	4	4	-	-	5	21	2	17
PY17X_1021000		60S ribosomal protein L5, putative	293	0	0	0	0	0	0	0	0	0	0	5	0.0170648	4	4	0	0	0	0	0	0	0	-	-	5	22	-	-
PY17X_1041800		ribosomal protein S27a, putative	149	0	0	0	0	0	0	0	0	0	0	5	0.033557	3	3	0	0	0	0	0	0	0	-	-	5	23	-	-
PY17X_1446600	CCT3	T-complex protein 1 subunit gamma, putative	542	0	0	0	0	0	0	0	0	0	0	5	0.00922509	5	5	0	0	0	0	1	1	1	-	-	5	24	-	-
PY17X_0917700	TCP1	T-complex protein 1 subunit alpha, putative	543	0	0	0	0	0	0	0	0	0	0	4	0.00736648	4	4	2	0.00368324	2	2	0	1	1	-	-	4	26	2	18
PY17X_0408800	CCT7	T-complex protein 1 subunit eta, putative	539	0	0	0	0	0	0	0	0	0	0	4	0.00742115	4	4	6	0.0111317	4	4	6	2	2	-	-	4	27	1	44
PY17X_1306600	TPx1	thioredoxin peroxidase, putative	195	0	0	0	0	0	0	0	0	0	0	4	0.0205128	4	4	5	0.025641	4	4	6	4	4	-	-	4	28	0.833333	70
PY17X_0407700	RPS12	40S ribosomal protein S12, putative	142	0	0	0	0	0	0	0	0	0	0	4	0.028169	4	4	0	0	0	0	0	0	0	-	-	4	29	-	-
PY17X_1112100		conserved Plasmodium protein, unknown function	622	0	0	0	0	0	0	0	0	0	0	4	0.00643087	3	3	0	0	0	0	0	0	0	-	-	4	30	-	-
PY17X_1138600	SEC24A	protein transport protein Sec24A, putative	942	0	0	0	0	0	0	0	0	0	0	4	0.00424628	4	4	0	0	0	0	0	0	0	-	-	4	31	-	-
PY17X_1336600	eIF4A	eukaryotic initiation factor 4a, putative	398	0	0	0	0	0	0	0	0	0	0	3.85714	0.00969131	5	3	2	0.00502513	2	2	2	2	2	-	-	3.85714	32	1	45
PY17X_1318600	eEF2	elongation factor 2, putative	832	0	0	0	0	0	0	0	0	0	0	3.2	0.00384615	4	2	12	0.0144231	7	6	20.8095	8	7	-	-	3.2	33	0.57666	83
PY17X_0521300		ADP/ATP transporter on adenylate translocase, putative	301	0	0	0	0	0	0	0	0	0	0	3.125	0.0103821	4	3	0	0	0	0	0	0	0	-	-	3.125	34	-	-
PY17X_0305300	SERA5	serine repeat antigen 5	711	0	0	0	0	0	0	0	2	2	2	6	0.00843882	6	6	0	0	0	0	0	0	0	-	-	3	35	-	-
PY17X_0703100		protein disulfide isomerase, putative	482	0	0	0	0	0	0	0	0	0	0	3	0.00622407	3	3	8	0.0165975	4	4	3	2	2	-	-	3	36	2.66667	13
PY17X_1221400	CCT5	T-complex protein 1 subunit epsilon, putative	535	0	0	0	0	0	0	0	0	0	0	3	0.00560748	3	3	10	0.0186916	6	5	5	2	2	-	-	3	37	2	19
PY17X_0311400	CCT8	T-complex protein 1 subunit theta, putative	543	0	0	0	0	0	0	0	0	0	0	3	0.00552486	3	3	13	0.0239411	7	7	9	3	3	-	-	3	38	1.44444	31
PY17X_0826800		glutamine synthetase, putative	552	0	0	0	0	0	0	0	0	0	0	3	0.00543478	3	3	4	0.00724638	2	2	3	2	2	-	-	3	39	1.33333	33
PY17X_1424900		conserved Plasmodium protein, unknown function	393	0	0	0	0	0	0	0	0	0	0	3	0.00763359	3	3	16	0.0407125	6	6	12	6	6	-	-	3	40	1.33333	34
PY17X_1135600	CCT4	T-complex protein 1 subunit delta, putative	529	0	0	0	0	0	0	0	0	0	0	3	0.00567108	3	3	4	0.00756144	3	3	4	3	3	-	-	3	41	1	46
PY17X_1361400	MyoA	myosin A	817	0	0	0	0	0	0	0	0	0	0	3	0.00367197	3	3	4	0.00489596	2	2	8	3	3	-	-	3	42	0.5	87
PY17X_0938900		actin-like protein, putative	378	0	0	0	0	0	0	0	0	0	0	3	0.00793651	3	3	0	0	0	0	0	0	0	-	-	3	43	-	-
PY17X_1118100	H2A	histone H2A, putative	133	0	0	0	0	0	0	0	0	0	0	3	0.0225564	3	2	0	0	0	0	3.3333	2	0	-	-	3	44	-	-
PY17X_0506200	ARF1	ADP-ribosylation factor, putative	181	0	0	0	0	0	0	0	0	0	0	2.57143	0.0142068	4	2	0	0	0	0	0	0	0	-	-	2.57143	45	-	-
PY17X_1334000		40S ribosomal protein S3, putative	222	0	0	0	0	0	0	0	0	0	0	2.34783	0.0105758	6	2	2.1143	0.00952387	3	2	2.0455	2	1	-	-	2.34783	46	1.03363	41
PY17X_1124300		hexokinase, putative	494	0	0	0	0	0	0	0	0	0	0	2	0.00404858	2	2	7	0.01417	2	2	0	0	0	-	-	2	47	7	5
PY17X_1207600	ALBA3	DNA/RNA-binding protein Alba 3, putative	107	0	0	0	0	0	0	0	0	0	0	2	0.0186916	2	2	2	0.0186916	1	1	0	0	0	-	-	2	48	2	20
PY17X_0410100	AS	asparagine synthetase [glutamine-hydrolyzing], putative	581	0	0	0	0	0	0	0	0	0	0	2	0.00344234	2	2	3	0.00516351	2	2	3	2	2	-	-	2	49	1	47
PY17X_1028600	GDH1	NADP-specific glutamate dehydrogenase, putative	470	0	0	0	0	0	0	0	0	0	0	2	0.00425532	2	2	6	0.012766	4	4	14	10	10	-	-	2	50	0.428571	93
PY17X_0717800	GAK	GTP:AMP phosphotransferase, putative	230	0	0	0	0	0	0	0	0	0	0	2	0.00869565	1	1	0	0	0	0	0	0	0	-	-	2	51	-	-
PY17X_0822300	GAP50	glideosome-associated protein 50, putative	395	0	0	0	0	0	0	0	0	0	0	2	0.00506329	2	2	0	0	0	0	1	1	1	-	-	2	52	-	-
PY17X_0826700	PGK	phosphoglycerate kinase, putative	416	0	0	0	0	0	0	0	0	0	0	2	0.00480769	1	1	0	0	0	0	0	0	0	-	-	2	53	-	-
PY17X_0935500	ROM1	rhomboid protease ROM1, putative	278	0	0	0	0	0	0	0	0	0	0	2	0.00719424	2	2	0	0	0	0	0	0	0	-	-	2	54	-	-
PY17X_1102500	RAP2/3	rhoptry-associated protein 2/3	389	0	0	0	0	0	0	0	0	0	0	2	0.00514139	2	2	0	0	0	0	0	0	0	-	-	2	55	-	-
PY17X_1420600	RAB11a	ras-related protein Rab-11A, putative	216	0	0	0	0	0	0	0	0	0	0	1.69892	0.00786539	6	1	0	0	0	0	0	0	0	-	-	1.69892	56	-	-
PY17X_1234400	RPS11	40S ribosomal protein S11, putative	151	0	0	0	0	0	0	0	0	0	0	1.66667	0.0110375	2	1	0	0	0	0	2.2609	2	1	-	-	1.66667	57	-	-
PY17X_1012200	CAM	calmodulin, putative	149	0	0	0	0	0	0	0	0	0	0	1.5	0.0100671	2	1	0	0	0	0	0	0	0	-	-	1.5	58	-	-
PY17X_1113400	RAB1b	ras-related protein Rab-1B, putative	200	0	0	0	0	0	0	0	0	0	0	1.39386	0.0069693	6	1	0	0	0	0	0	0	0	-	-	1.39386	60	-	-
PY17X_1448300	RAB2	ras-related protein Rab-2, putative	213	0	0	0	0	0	0	0	0	0	0	1.33333	0.00625978	2	1	0	0	0	0	0	0	0	-	-	1.33333	61	-	-
PY17X_1452800		ATP synthase subunit beta, mitochondrial, putative	533	0	0	0	0	0	0	0	0	0	0	1.30645	0.00245113	28	1	0	0	0	0	0	0	0	-	-	1.30645	62	-	-
PY17X_1032500	ACT2	actin II	376	0	0	0	0	0	0	0	0	0	0	1.18867	0.00316134	3	1	6.4348	0.0171138	4	2	0	3	0	-	-	1.18867	64	6.4348	6
PY17X_0421000	RAB7	ras-related protein RAB7, putative	206	0	0	0	0	0	0	0	0	0	0	1.09892	0.00533459	3	1	3.6429	0.017684	4	2	2.6667	4	2	-	-	1.09892	65	1.36607	32
PY17X_0915900	UIS24	heat shock protein 70, putative	663	0	0	0	0	0	0	0	0	0	0	1.05556	0.00159209	2	1	22.0936	0.0333237	11	10	12.1121	7	6	-	-	1.05556	66	1.82409	27
PY17X_0314300		ATP synthase F1, alpha subunit, putative	548	0	0	0	0	0	0	0	0	0	0	1.03738	0.00189303	5	1	0	0	0	0	1.0456	4	1	-	-	1.03738	67	-	-
PY17X_1439800	GRP94	endoplasmin, putative	808	0	0	0	0	0	0	0	0	0	0	1	0.00123762	1	1	2	0.00247525	1	1	0	0	0	-	-	1	69	2	21
PY17X_1312400	ALDO2	fructose-bisphosphate aldolase 2	369	0	0	0	0	0	0	0	0	0	0	1	0.00271003	1	1	20	0.0542005	11	11	32	18	18	-	-	1	70	0.625	81
PY17X_0718900		small GTP-binding protein sar1, putative	191	0	0	0	0	0	0	0	0	0	0	1	0.0052356	1	1	2	0.0104712	1	1	4	2	2	-	-	1	71	0.5	88
PY17X_1114100	PNP	purine nucleoside phosphorylase, putative	244	0	0	0	0	0	0	0	0	0	0	1	0.00409836	1	1	7	0.0286885	5	5	14	7	7	-	-	1	72	0.5	89
PY17X_1212600	ISP1	inner membrane complex sub-compartment protein 1, putative	143	0	0	0	0	0	0	0	0	0	0	1	0.00699301	1	1	2	0.013986	2	2	4	2	2	-	-	1	73	0.5	90
PY17X_0512500	nPrx	peroxiredoxin, putative	413	0	0	0	0	0	0	0	0	0	0	1	0.00242131	1	1	0	0	0	0	0	0	0	-	-	1	74	-	-
PY17X_0712400	PBLP	BEM46-like protein	287	0	0	0	0	0	0	0	0	0	0	1	0.00348432	1	1	0	0	0	0	0	0	0	-	-	1	75	-	-
PY17X_0811300	B9	6-cysteine protein	860	0	0	0	0	0	0	0	0	0	0	1	0.00116279	1	1	0	0	0	0	0	0	0	-	-	1	76	-	-
PY17X_0823500	TrxL1	thioredoxin-like protein 1, putative	206	0	0	0	0	0	0	0	0	0	0	1	0.00485437	1	1	0	0	0	0	0	0	0	-	-	1	77	-	-
PY17X_0913600	CK1	casein kinase 1, putative	323	0	0	0	0	0	0	0	0	0	0	1	0.00309598	1	1	0	0	0	0	0	0	0	-	-	1	78	-	-
PY17X_0934500	SET7	histone-lysine N-methyltransferase SET7, putative	707	0	0	0	0	0	0	0	0	0	0	1	0.00141443	1	1	0	0	0	0	0	0	0	-	-	1	79	-	-
PY17X_1026000,PY17X_1451300	SPB4	ATP-dependent rRNA helicase SPB4, putative;helicase, putative	983	0	0	0	0	0	0	0	0	0	0	1	0.00101729	1	1	0	0	0	0	0	0	0	-	-	1	80	-	-
PY17X_1030400		ubiquitin carboxyl-terminal hydrolase, putative	1257	0	0	0	0	0	0	0	0	0	0	1	0.000795545	1	1	0	0	0	0	0	0	0	-	-	1	81	-	-
PY17X_1032700	NTF2	nuclear transport factor 2, putative	125	0	0	0	0	0	0	0	0	0	0	1	0.008	1	1	0	0	0	0	0	0	0	-	-	1	82	-	-
PY17X_1034500	RAP1	rhoptry-associated protein 1, putative	608	0	0	0	0	0	0	0	0	0	0	1	0.00164474	1	1	0	0	0	0	0	0	0	-	-	1	83	-	-
PY17X_1037500	NOP1	rRNA 2'-O-methyltransferase fibrillarin, putative	321	0	0	0	0	0	0	0	0	0	0	1	0.00311526	1	1	0	0	0	0	0	0	0	-	-	1	84	-	-
PY17X_1105300	BCKDHB	2-oxoisovalerate dehydrogenase subunit beta, mitochondrial, putative	371	0	0	0	0	0	0	0	0	0	0	1	0.00269542	1	1	0	0	0	0	0	0	0	-	-	1	85	-	-
PY17X_1125100		conserved Plasmodium protein, unknown function	487	0	0	0	0	0	0	0	0	0	0	1	0.00205339	1	1	0	0	0	0	0	0	0	-	-	1	86	-	-
PY17X_1129300		DnaJ protein, putative	379	0	0	0	0	0	0	0	0	0	0	1	0.00263852	1	1	0	0	0	0	0	0	0	-	-	1	87	-	-
PY17X_1131900		proteasome subunit alpha type-7, putative	241	0	0	0	0	0	0	0	0	0	0	1	0.00414938	1	1	0	0	0	0	0	0	0	-	-	1	88	-	-
PY17X_1207400	IMP4	IMP1-like protein, putative	466	0	0	0	0	0	0	0	0	0	0	1	0.00214592	1	1	0	0	0	0	0	0	0	-	-	1	89	-	-
PY17X_1209600		endonuclease, putative	390	0	0	0	0	0	0	0	0	0	0	1	0.0025641	1	1	0	0	0	0	0	0	0	-	-	1	90	-	-
PY17X_1213100		conserved Plasmodium protein, unknown function	175	0	0	0	0	0	0	0	0	0	0	1	0.00571429	1	1	0	0	0	0	0	0	0	-	-	1	91	-	-
PY17X_1238200	RPS9	40S ribosomal protein S9, putative	189	0	0	0	0	0	0	0	0	0	0	1	0.00529101	1	1	0	0	0	0	0	0	0	-	-	1	92	-	-
PY17X_1321300	GluPho	glucose-6-phosphate dehydrogenase-6-phosphogluconolactonase, putative	949	0	0	0	0	0	0	0	0	0	0	1	0.00105374	1	1	0	0	0	0	0	0	0	-	-	1	93	-	-
PY17X_1361300	SPECT1	sporozoite protein essential for cell traversal	241	0	0	0	0	0	0	0	0	0	0	1	0.00414938	1	1	0	0	0	0	0	0	0	-	-	1	94	-	-
PY17X_1366000	ALBA4	DNA/RNA-binding protein Alba 4	374	0	0	0	0	0	0	0	0	0	0	1	0.0026738	1	1	0	0	0	0	0	0	0	-	-	1	95	-	-
PY17X_1434200		glycerol-3-phosphate dehydrogenase [NAD(+)], putative	368	0	0	0	0	0	0	0	0	0	0	1	0.00271739	1	1	0	0	0	0	0	0	0	-	-	1	96	-	-
PY17X_0524100		alpha tubulin 2	450	0	0	0	0	0	0	0	0	0	0	0	0	0	0	5.2143	0.0115873	8	1	0	9	0	-	-	-	-	5.2143	7
PY17X_0403800	NSF	N-ethylmaleimide-sensitive fusion protein, putative	776	0	0	0	0	0	0	0	0	0	0	0	0	0	0	5	0.0064433	4	4	0	0	0	-	-	-	-	5	8
PY17X_1118800	MDH	malate dehydrogenase, putative	313	0	0	0	0	0	0	0	0	0	0	0	0	0	0	4	0.0127796	3	3	0	0	0	-	-	-	-	4	9
PY17X_0519800		methionine--tRNA ligase, putative	898	0	0	0	0	0	0	0	0	0	0	0	0	0	0	7	0.0077951	2	2	2	2	2	-	-	-	-	3.5	10
PY17X_1038300	GDPD	glycerophosphodiester phosphodiesterase, putative	461	0	0	0	0	0	0	0	0	0	0	0	0	0	0	3	0.00650759	2	2	0	1	1	-	-	-	-	3	11
PY17X_1351500		glutamine--tRNA ligase, putative	875	0	0	0	0	0	0	0	0	0	0	0	0	0	0	3	0.00342857	1	1	0	0	0	-	-	-	-	3	12
PY17X_0945400		phenylalanine--tRNA ligase beta subunit, putative	626	0	0	0	0	0	0	0	0	0	0	0	0	0	0	7	0.0111821	2	2	3	2	2	-	-	-	-	2.33333	14
PY17X_1024700	GlyRS	glycine--tRNA ligase, putative	806	0	0	0	0	0	0	0	0	0	0	0	0	0	0	16	0.0198511	12	12	7	4	4	-	-	-	-	2.28571	15
PY17X_0312300	ACS9	acyl-CoA synthetase, putative	753	0	0	0	0	0	0	0	0	0	0	0	0	0	0	2	0.00265604	1	1	0	0	0	-	-	-	-	2	22
PY17X_1137200	CELF1	CUGBP Elav-like family member 1, putative	511	0	0	0	0	0	0	0	0	0	0	0	0	0	0	4	0.00782779	2	2	2	1	1	-	-	-	-	2	23
PY17X_1431400		conserved Plasmodium protein, unknown function	596	0	0	0	0	0	0	0	0	0	0	0	0	0	0	2	0.0033557	1	1	0	0	0	-	-	-	-	2	24
PY17X_0941000		succinyl-CoA synthetase alpha subunit, putative	329	0	0	0	0	0	0	0	0	0	0	0	0	0	0	2.0851	0.00633769	3	2	1.1136	2	1	-	-	-	-	1.8724	25
PY17X_1105900	ALP2b	actin-like protein, putative	556	0	0	0	0	0	0	0	0	0	0	0	0	0	0	5	0.00899281	3	3	3	2	2	-	-	-	-	1.66667	28
PY17X_1242000		karyopherin beta, putative	1126	0	0	0	0	0	0	0	0	0	0	0	0	0	0	6	0.0053286	5	5	4	3	3	-	-	-	-	1.5	30
PY17X_0311500	SEC31	protein transport protein SEC31, putative	1393	0	0	0	0	0	0	0	0	0	0	0	0	0	0	5	0.00358938	3	3	4	1	1	-	-	-	-	1.25	35
PY17X_0902700	MAEBL	membrane associated erythrocyte binding-like protein	1701	0	0	0	0	0	0	0	0	0	0	0	0	0	0	5	0.00293945	3	3	4	1	1	-	-	-	-	1.25	36
PY17X_1216800	CysRS	cysteine--tRNA ligase, putative	665	0	0	0	0	0	0	0	0	0	0	0	0	0	0	5	0.0075188	3	3	4	2	2	-	-	-	-	1.25	37
PY17X_1123100		leucine--tRNA ligase, putative	1278	0	0	0	0	0	0	0	0	0	0	0	0	0	0	12	0.00938967	8	8	11	6	6	-	-	-	-	1.09091	40
PY17X_0307400	UAP56	ATP-dependent RNA helicase UAP56, putative	466	0	0	0	0	0	0	0	0	0	0	0	0	0	0	1	0.00214592	1	1	0	0	0	-	-	-	-	1	48
PY17X_0502800	ELC	essential light chain ELC, putative	129	0	0	0	0	0	0	0	0	0	0	0	0	0	0	1	0.00775194	1	1	1	1	1	-	-	-	-	1	49
PY17X_0623500		conserved Plasmodium protein, unknown function	597	0	0	0	0	0	0	0	0	0	0	0	0	0	0	9	0.0150754	4	4	9	3	3	-	-	-	-	1	50
PY17X_0702200	GAMA	GPI-anchored micronemal antigen, putative	624	0	0	0	0	0	0	0	0	0	0	0	0	0	0	2	0.00320513	1	1	2	1	1	-	-	-	-	1	51
PY17X_0824000		TLD domain-containing protein	1036	0	0	0	0	0	0	0	0	0	0	0	0	0	0	1	0.000965251	1	1	0	0	0	-	-	-	-	1	52
PY17X_0933300	DPAP1	dipeptidyl aminopeptidase 1, putative	681	0	0	0	0	0	0	0	0	0	0	0	0	0	0	2	0.00293686	1	1	2	1	1	-	-	-	-	1	53
PY17X_1014700		succinyl-CoA ligase [ADP-forming] subunit beta, putative	458	0	0	0	0	0	0	0	0	0	0	0	0	0	0	2	0.00436681	1	1	2	1	1	-	-	-	-	1	54
PY17X_1132500	ADSS	adenylosuccinate synthetase, putative	439	0	0	0	0	0	0	0	0	0	0	0	0	0	0	1	0.0022779	1	1	0	0	0	-	-	-	-	1	55
PY17X_1139300	PCNA1	proliferating cell nuclear antigen 1, putative	274	0	0	0	0	0	0	0	0	0	0	0	0	0	0	1	0.00364964	1	1	0	0	0	-	-	-	-	1	56
PY17X_1328100	ISP3	inner membrane complex sub-compartment protein 3, putative	150	0	0	0	0	0	0	0	0	0	0	0	0	0	0	2	0.0133333	1	1	2	1	1	-	-	-	-	1	57
PY17X_1329400		valine--tRNA ligase, putative	1077	0	0	0	0	0	0	0	0	0	0	0	0	0	0	1	0.000928505	1	1	0	0	0	-	-	-	-	1	58
PY17X_1361600	PEPCK	phosphoenolpyruvate carboxykinase, putative	570	0	0	0	0	0	0	0	0	0	0	0	0	0	0	1	0.00175439	1	1	0	1	1	-	-	-	-	1	59
PY17X_1364300	IDH	isocitrate dehydrogenase [NADP], mitochondrial, putative	469	0	0	0	0	0	0	0	0	0	0	0	0	0	0	1	0.0021322	1	1	1	1	1	-	-	-	-	1	60
PY17X_1440500	PKAr	cAMP-dependent protein kinase regulatory subunit, putative	431	0	0	0	0	0	0	0	0	0	0	0	0	0	0	1	0.00232019	1	1	0	0	0	-	-	-	-	1	61
PY17X_1443900	PCNA2	proliferating cell nuclear antigen 2, putative	264	0	0	0	0	0	0	0	0	0	0	0	0	0	0	1	0.00378788	1	1	0	1	1	-	-	-	-	1	62
PY17X_1466700		coronin, putative	538	0	0	0	0	0	0	0	0	0	0	0	0	0	0	2	0.00371747	2	2	2	2	2	-	-	-	-	1	63
PY17X_1453700		p25-alpha family protein, putative	152	0	0	0	0	0	0	0	0	0	0	0	0	0	0	13	0.0855263	5	5	14	6	6	-	-	-	-	0.928571	66
PY17X_1412100		M1-family alanyl aminopeptidase, putative	1064	0	0	0	0	0	0	0	0	0	0	0	0	0	0	12	0.0112782	6	6	13	7	7	-	-	-	-	0.923077	67
PY17X_1214000	HGPRT	hypoxanthine-guanine phosphoribosyltransferase, putative	231	0	0	0	0	0	0	0	0	0	0	0	0	0	0	11	0.047619	6	6	13	7	7	-	-	-	-	0.846154	68
PY17X_1144900	AlaRS	alanine--tRNA ligase, putative	1218	0	0	0	0	0	0	0	0	0	0	0	0	0	0	4	0.00328407	2	2	5	2	2	-	-	-	-	0.8	74
PY17X_1316500	GEST	gamete egress and sporozoite traversal protein, putative	249	4	2	2	0	0	0	0	3	1	1	0	0	0	0	4	0.0160643	2	2	5	2	2	-	-	-	-	0.8	75
PY17X_1138400	FLN	falcilysin, putative	1149	0	0	0	0	0	0	0	0	0	0	0	0	0	0	3	0.00261097	2	2	4	2	2	-	-	-	-	0.75	76
PY17X_0420500		alpha tubulin 1	453	0	0	0	0	0	0	0	0	0	0	0	0	0	0	10.8188	0.0238826	10	1	15.0667	13	2	-	-	-	-	0.71806	77
PY17X_1427100	KARalpha	karyopherin alpha, putative	545	0	0	0	0	0	0	0	0	0	0	0	0	0	0	5	0.00917431	3	3	7	2	2	-	-	-	-	0.714286	78
PY17X_1357200	EF-1gamma	elongation factor 1-gamma, putative	404	0	0	0	0	0	0	0	0	0	0	0	0	0	0	4	0.00990099	3	3	6	4	3	-	-	-	-	0.666667	80
PY17X_1411000		RNA-binding protein, putative	154	0	0	0	0	0	0	0	0	0	0	0	0	0	0	3	0.0194805	3	3	5	2	2	-	-	-	-	0.6	82
PY17X_1458700	rabGDI	rab specific GDP dissociation inhibitor, putative	454	0	0	0	0	0	0	0	0	0	0	0	0	0	0	2	0.00440529	1	1	4	2	2	-	-	-	-	0.5	91
PY17X_0704200	RACK1	receptor for activated c kinase, putative	322	0	0	0	0	0	0	0	0	0	0	0	0	0	0	6	0.0186335	4	4	13	5	5	-	-	-	-	0.461538	92
PY17X_1433000	Trx-Px2	thioredoxin peroxidase 2, putative	215	0	0	0	0	0	0	0	0	0	0	0	0	0	0	2	0.00930233	1	1	6	3	3	-	-	-	-	0.333333	95
PY17X_0931800		insulinase, putative	1269	0	0	0	0	0	0	0	0	0	0	0	0	0	0	1	0.000788022	1	1	4	1	1	-	-	-	-	0.25	96
PY17X_0205200		phenylalanine--tRNA ligase alpha subunit, putative	570	0	0	0	0	0	0	0	0	0	0	0	0	0	0	0	0	0	0	1	1	1	-	-	-	-	-	-
PY17X_0210500	TRSP	thrombospondin related sporozoite protein, putative	174	0	0	0	0	0	0	0	0	0	0	0	0	0	0	0	0	0	1	1	1	1	-	-	-	-	-	-
PY17X_0308300		conserved Plasmodium protein, unknown function	395	0	0	0	0	0	0	0	0	0	0	0	0	0	0	0	0	0	0	1	1	1	-	-	-	-	-	-
PY17X_0608400		conserved Plasmodium protein, unknown function	390	0	0	0	0	0	0	0	0	0	0	0	0	0	0	0	0	0	0	5	2	2	-	-	-	-	-	-
PY17X_0714500	HSP20	small heat shock protein HSP20, putative	171	0	0	0	0	0	0	0	0	0	0	0	0	0	0	0	0	0	0	2	1	1	-	-	-	-	-	-
PY17X_0810800	RPS11	40S ribosomal protein S11, putative	161	0	0	0	0	0	0	0	0	0	0	0	0	0	0	0	0	0	1	2	1	1	-	-	-	-	-	-
PY17X_0826400	SAMS	S-adenosylmethionine synthetase, putative	402	0	0	0	0	0	0	0	0	0	0	0	0	0	0	0	0	0	0	1	1	1	-	-	-	-	-	-
PY17X_0836900		conserved Plasmodium protein, unknown function	1054	0	0	0	0	0	0	0	1	1	0	0	0	0	0	0	0	0	0	0	0	0	-	-	-	-	-	-
PY17X_1023900		40S ribosomal protein S25, putative	105	0	0	0	0	0	0	0	1	1	1	0	0	0	0	0	0	0	0	0	0	0	-	-	-	-	-	-
PY17X_1127700	DJ1	protein DJ-1, putative	189	0	0	0	0	0	0	0	0	0	0	0	0	0	0	0	0	0	0	1	1	1	-	-	-	-	-	-
PY17X_1133500	NIF3	NLI interacting factor-like phosphatase, putative	1177	0	0	0	0	0	0	0	0	0	0	0	0	0	0	0	0	0	0	1	1	1	-	-	-	-	-	-
PY17X_1334200	PPKL	protein phosphatase containing kelch-like domains, putative	881	0	0	0	0	0	0	0	0	0	0	0	0	0	0	0	0	0	0	3	2	2	-	-	-	-	-	-
PY17X_1360900		aconitate hydratase, putative	914	0	0	0	0	0	0	0	0	0	0	0	0	0	0	0	0	0	0	4	2	2	-	-	-	-	-	-
PY17X_1418600	SMC2	structural maintenance of chromosomes protein 2, putative	1227	0	0	0	0	0	0	0	1	1	1	0	0	0	0	0	0	0	0	0	0	0	-	-	-	-	-	-
PY17X_1425600		40S ribosomal protein S16, putative	144	0	0	0	0	0	0	0	0	0	0	0	0	0	0	0	0	0	1	1	1	1	-	-	-	-	-	-
PY17X_1462100	MTIP	myosin A tail domain interacting protein	204	0	0	0	0	0	0	0	0	0	0	0	0	0	0	0	0	0	0	1	1	1	-	-	-	-	-	-
PY17X_1444700	SOC2	protein SOC2, putative	5620	1	1	1	0	0	0	0	0	0	0	0	0	0	0	0	0	0	0	0	0	0	-	-	-	-	-	-
PY17X_1409600	PRPF3	U4/U6 small nuclear ribonucleoprotein PRP3, putative	679	0	0	0	0	0	0	0	2	2	2	0	0	0	0	0	0	0	0	0	0	0	-	-	-	-	-	-
PY17X_1245500	HIP	Hsc70-interacting protein, putative	447	0	0	0	0	0	0	0	6	3	3	0	0	0	0	0	0	0	0	0	0	0	-	-	-	-	-	-
